# Supplementary material for: Investigation of crystal field effects for the spectral broadening of Yb3+-doped LuxY2−xO3 sesquioxide crystals
Source: Royal Society of Chemistry journal article supplement (doi:10.1039/d2ra03639h), 2022-01-01
Supplement: d2ra03639h1.pdf [file d2ra03639h1.pdf]

## Supplementary Information

# Investigation of crystal field effects for the spectral broadening of Yb<sup>3+</sup>-doped Lu<sub>x</sub>Y<sub>2-x</sub>O<sub>3</sub> sesquioxide crystals

Ruiqi Guo,<sup>1</sup> Dapeng Huang,<sup>1</sup> Dazhi Lu,<sup>1</sup> Fei Liang,<sup>1</sup> Qingli Zhang,<sup>2</sup> Haohai Yu,<sup>1</sup> Huaijin Zhang<sup>1</sup>

<sup>1</sup>State Key Laboratory of Crystal Materials and Institute of Crystal Materials, Shandong University, Jinan 250100, China

<sup>2</sup>Anhui Institute of Optics and Fine Mechanics, Chinese Academy of Sciences, Hefei 230031, China

**Table S1.** Lattice parameters of the Yb:Lu<sub>x</sub>Y<sub>2-x</sub>O<sub>3</sub> series crystals

| <i>x</i>     | 0       | 0.79   | 0.99    | 1.19   | 1.39    | 2.00    |
|--------------|---------|--------|---------|--------|---------|---------|
| <i>a</i> (Å) | 10.3776 | 10.462 | 10.4796 | 10.494 | 10.5218 | 10.6056 |

**Table S2.** Crystal field parameters obtained by SM fitting as initial parameters of CFPfit (unit: cm<sup>-1</sup>).

| <i>x</i> | $B_0^2(0)$ | $B_2^2(0)$     | $B_0^4(0)$     | $B_2^4(0)$     | $B_4^4(0)$       |
|----------|------------|----------------|----------------|----------------|------------------|
| 0        | -98.67     | 129.95+316.65i | -1224.47       | 36.87+1351.2i  | -1140.53-269i    |
| 0.79     | -175.1     | 121.37+395.6i  | -1179.04       | 14.33+1294.9i  | -1134.49-264.08i |
| 0.99     | -151.22    | 115.31+353.03i | -1202.01       | 16.2+1335.9i   | -1159.46-274.12i |
| 1.19     | -185.64    | 154.26+439.09i | -1153.11       | 19.36+1281.36i | -1112.39-263.76i |
| 1.39     | -135.08    | 134.63+376.5i  | -1214.65       | 27.66+1347.57i | -1147.49-268.81i |
| 2.00     | -135.25    | 84.05+378.37i  | -1256.62       | 13.7+1374.51i  | -1163.36-258.5i  |
| <i>x</i> | $B_0^6(0)$ | $B_2^6(0)$     | $B_4^6(0)$     | $B_6^6(0)$     |                  |
| 0        | 133.58     | 11.31+32.82i   | -484.89-15.05i | -68.08+59.45i  |                  |
| 0.79     | 193.03     | 16.12+29.76i   | -622-35.73i    | -73.96+82.52i  |                  |
| 0.99     | 190.77     | 17.08+35.09i   | -641.5-34.83i  | -79.91+86.6i   |                  |
| 1.19     | 206.85     | 17.85+39.89i   | -694.97-34.98i | -90.16+93.25i  |                  |

|      |        |              |                |               |
|------|--------|--------------|----------------|---------------|
| 1.39 | 186.29 | 17.64+35.43i | -654.81-26.52i | -84.66+82.52i |
| 2.00 | 195.37 | 22.17+13.03i | -666.56-36.22i | -63.23+78.12i |

**Table S3.** Experimental and calculated energy levels in unit  $\text{cm}^{-1}$  and calculational accuracy of CFPFit\*.

| $x$  |                  | E(1)  | E(2)   | E(3)   | E(4)   | E(5)     | E(6)     | E(7)     | $R$ (%) | $\sigma$ ( $\text{cm}^{-1}$ ) |
|------|------------------|-------|--------|--------|--------|----------|----------|----------|---------|-------------------------------|
|      | $E_{\text{Exp}}$ | 0     | 422.72 | 532.45 | 943.58 | 10245.9  | 10548.52 | 11013.22 |         |                               |
| 0    | $E_{\text{Cal}}$ | -0.17 | 422.85 | 532.7  | 944.28 | 10246.01 | 10548.35 | 11012.38 | 0.0063  | 0.9469                        |
|      | $\Delta_E$       | 0.17  | -0.13  | -0.25  | -0.7   | -0.11    | 0.17     | 0.84     |         |                               |
|      | $E_{\text{Exp}}$ | 0     | 448.64 | 555.21 | 956.68 | 10256.41 | 10559.66 | 11025.36 |         |                               |
| 0.79 | $E_{\text{Cal}}$ | 0     | 448.65 | 555.23 | 956.73 | 10256.41 | 10559.64 | 11025.3  | 0.0005  | 0.0683                        |
|      | $\Delta_E$       | 0     | -0.01  | -0.02  | -0.05  | 0        | 0.02     | 0.06     |         |                               |
|      | $E_{\text{Exp}}$ | 0     | 452.49 | 558.97 | 960.14 | 10256.41 | 10565.24 | 11031.44 |         |                               |
| 0.99 | $E_{\text{Cal}}$ | -0.01 | 452.5  | 558.99 | 960.2  | 10256.42 | 10565.23 | 11031.37 | 0.0005  | 0.0787                        |
|      | $\Delta_E$       | 0.01  | -0.01  | -0.02  | -0.06  | -0.01    | 0.01     | 0.07     |         |                               |
|      | $E_{\text{Exp}}$ | 0     | 463.51 | 565.17 | 967.99 | 10261.67 | 10570.82 | 11037.53 |         |                               |
| 1.19 | $E_{\text{Cal}}$ | 0     | 463.54 | 565.2  | 968.06 | 10261.66 | 10570.79 | 11037.45 | 0.0006  | 0.097                         |
|      | $\Delta_E$       | 0     | -0.03  | -0.03  | -0.07  | 0.01     | 0.03     | 0.08     |         |                               |
|      | $E_{\text{Exp}}$ | 0     | 467.35 | 565.17 | 972.31 | 10261.67 | 10576.41 | 11043.62 |         |                               |
| 1.39 | $E_{\text{Cal}}$ | -0.01 | 467.37 | 565.19 | 972.37 | 10261.66 | 10576.38 | 11043.54 | 0.0006  | 0.0891                        |
|      | $\Delta_E$       | 0.01  | -0.02  | -0.02  | -0.06  | 0.01     | 0.03     | 0.08     |         |                               |
|      | $E_{\text{Exp}}$ | 0     | 482.2  | 577.02 | 992.22 | 10266.94 | 10587.61 | 11049.72 |         |                               |
| 2.00 | $E_{\text{Cal}}$ | 0.52  | 483.05 | 577.93 | 993.56 | 10266.07 | 10586.41 | 11048.2  | 0.0154  | 2.3272                        |
|      | $\Delta_E$       | -0.52 | -0.85  | -0.91  | -1.34  | 0.87     | 1.2      | 1.52     |         |                               |

$$*\Delta_E = E_{\text{Exp}} - E_{\text{Cal}}, R = \sqrt{\frac{\sum_{i=1}^{14} (E_i^{\text{exp}} - E_i^{\text{cal}})^2}{\sum_{i=1}^{14} (E_i^{\text{exp}})^2}}, \sigma = \sqrt{\frac{\sum_{i=1}^{14} (E_i^{\text{exp}} - E_i^{\text{cal}})^2}{3}}$$
